# Supplementary material for: Golgi-independent secretory trafficking through recycling endosomes in neuronal dendrites and spines
Source: eLife journal article supplement (doi:10.7554/elife.27362), 2017-08-31
Supplement: supp [file elife-27362-supp-v1.zip]

Archive with 24 entries (24 files):
- elife_poa_e27362_supplemental_movie_1.mp4
- elife_poa_e27362_Figure_8_figure_supplement_2.pdf
- elife_poa_e27362_Figure_5_figure_supplement_2.pdf
- elife_poa_e27362_Figure_6_supplement_2.pdf
- elife_poa_e27362_Figure_8_figure_supplement_4.pdf
- elife_poa_e27362_Transparent_Reporting_File.docx
- elife_poa_e27362_Figure_4_figure_supplement_4.pdf
- elife_poa_e27362_Figure_6_figure_supplement_4.pdf
- elife_poa_e27362_Figure_4_figure_supplement_3.pdf
- elife_poa_e27362_Figure_5_figure_supplement_3.pdf
- elife_poa_e27362_Figure_4_figure_supplement_1.pdf
- elife_poa_e27362_Figure_6_figure_supplement_3.pdf
- elife_poa_e27362_supplemental_movie_2.mp4
- elife_poa_e27362_Figure_1_figure_supplement_2.pdf
- elife_poa_e27362_Figure_8_figure_supplement_1.pdf
- elife_poa_e27362_Figure_4_figure_supplement_2.pdf
- elife_poa_e27362_Figure_5_figure_supplement_1.pdf
- elife_poa_e27362_supplemental_movie_4.mp4
- elife_poa_e27362_Figure_6_figure_supplement_1.pdf
- elife_poa_e27362_Figure_1_figure_supplement_1.pdf
- elife_poa_e27362_Figure_2_figure_supplement_1.pdf
- elife_poa_e27362_Figure_8_figure_supplement_3.pdf
- elife_poa_e27362_supplemental_movie_3.mp4
- elife_poa_e27362_Figure_1_figure_supplement_3.pdf
