# Supplementary figures and images for: Golgi-independent secretory trafficking through recycling endosomes in neuronal dendrites and spines
Source: eLife journal article supplement (doi:10.7554/elife.27362), 2017-08-31

Bowen et al. Figure 4 - figure supplement 1

120' Post-Release (20°)

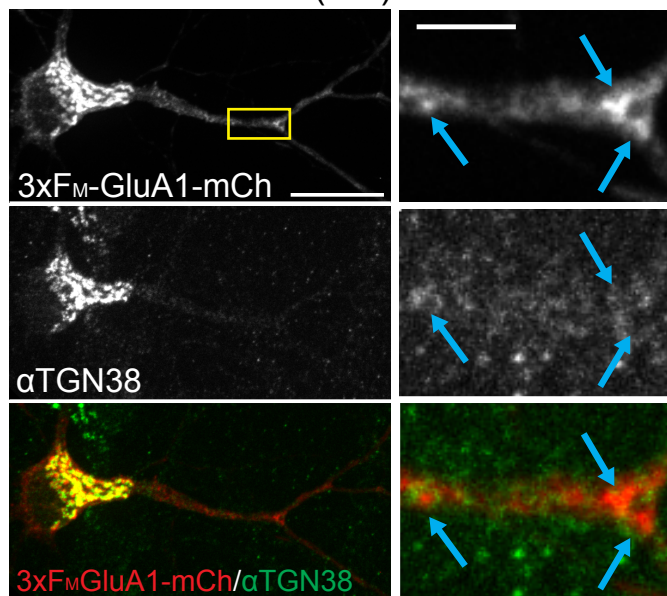

Supplement: supp [file elife-27362-supp-v1.zip]

Bowen et al. Figure 1 - figure supplement 2

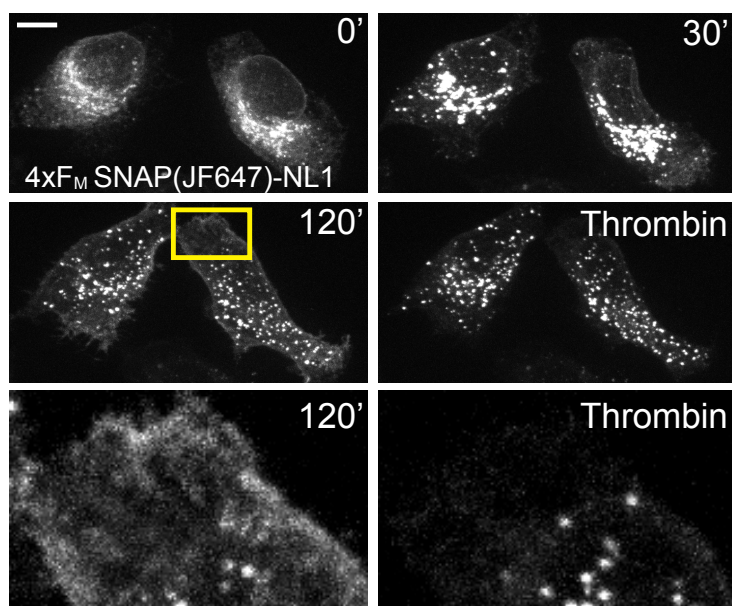

Supplement: supp [file elife-27362-supp-v1.zip]

Bowen et al. Figure 5 - figure supplement 3

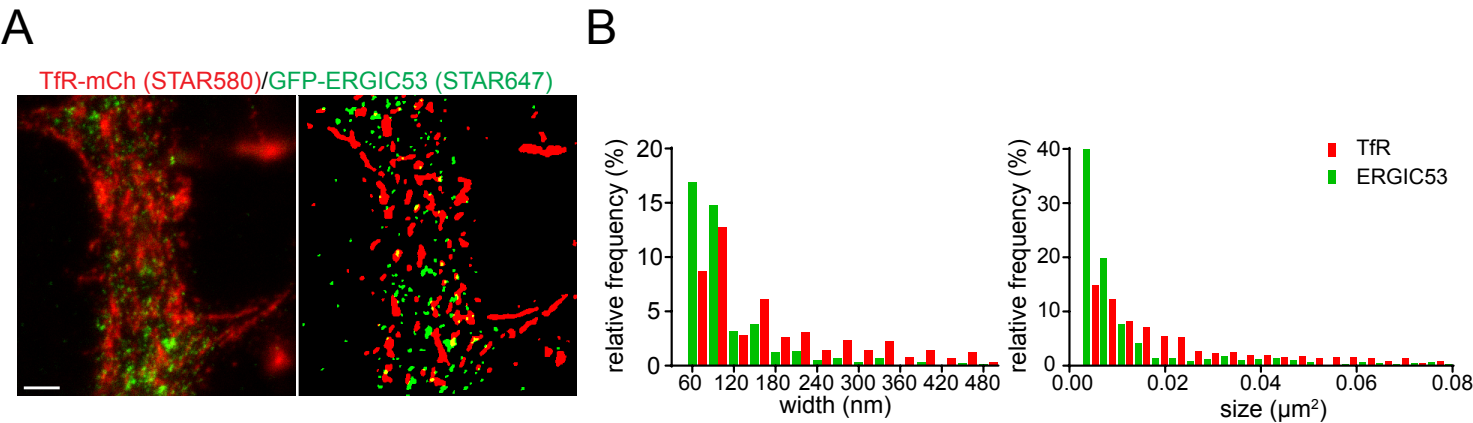

Supplement: supp [file elife-27362-supp-v1.zip]

Bowen et al. Figure 6 - figure supplement 1

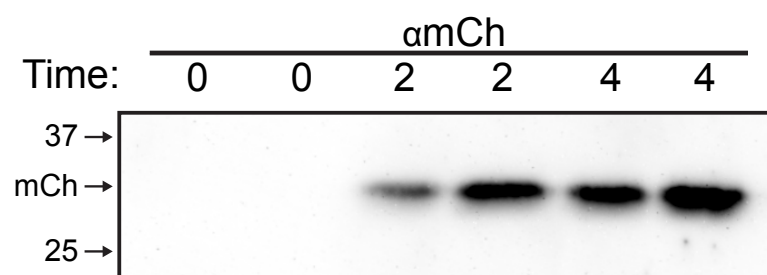

Supplement: supp [file elife-27362-supp-v1.zip]

Bowen et al. Figure 8 - figure supplement 3

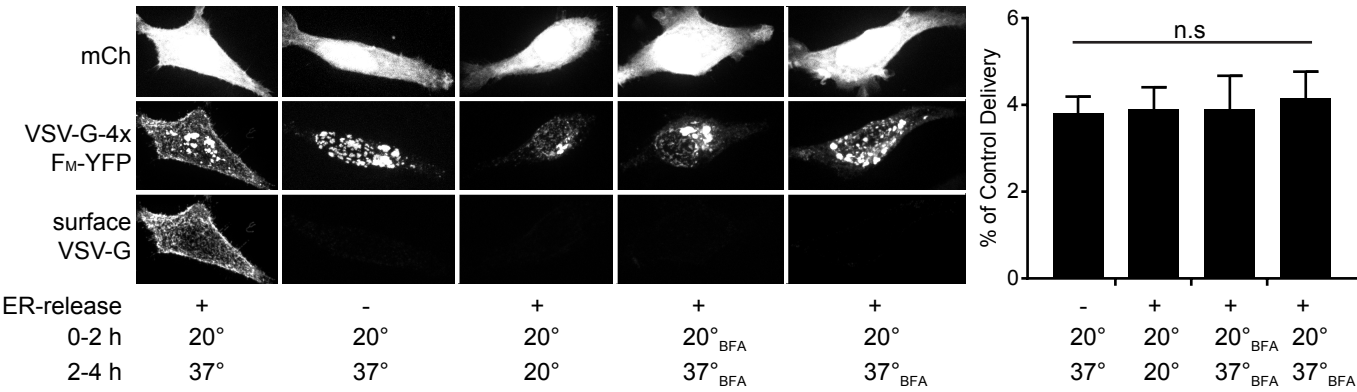

Supplement: supp [file elife-27362-supp-v1.zip]

Bowen et al. Figure 4 - figure supplement 3

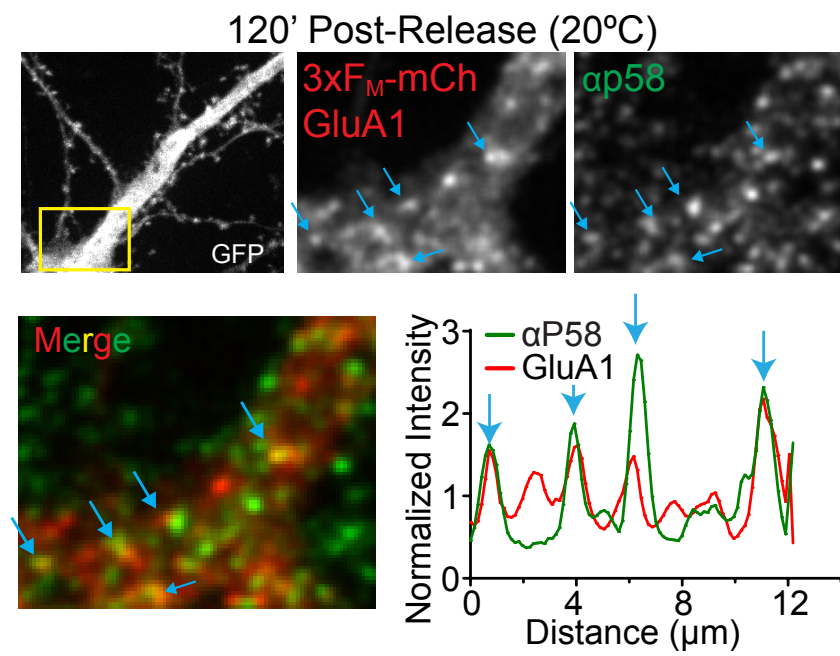

Supplement: supp [file elife-27362-supp-v1.zip]

Bowen et al. Figure 8 - figure supplement 2

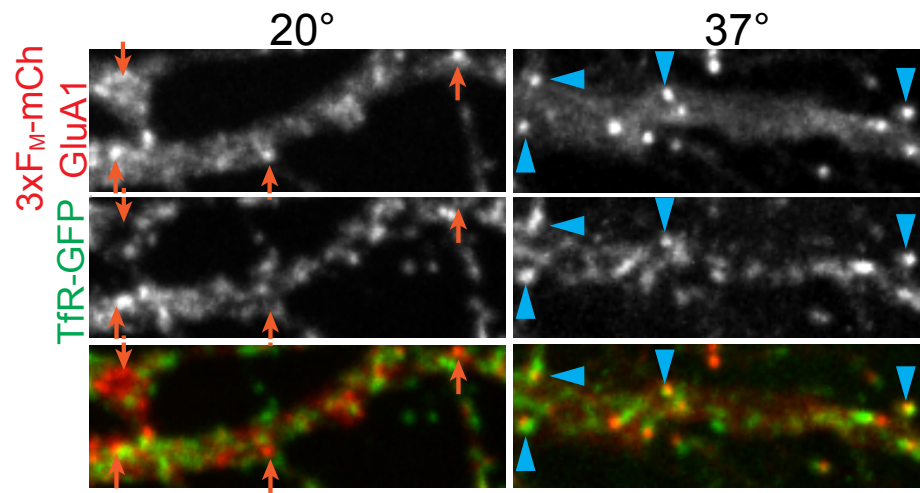

Supplement: supp [file elife-27362-supp-v1.zip]

Bowen et al. Figure 1 - figure supplement 3

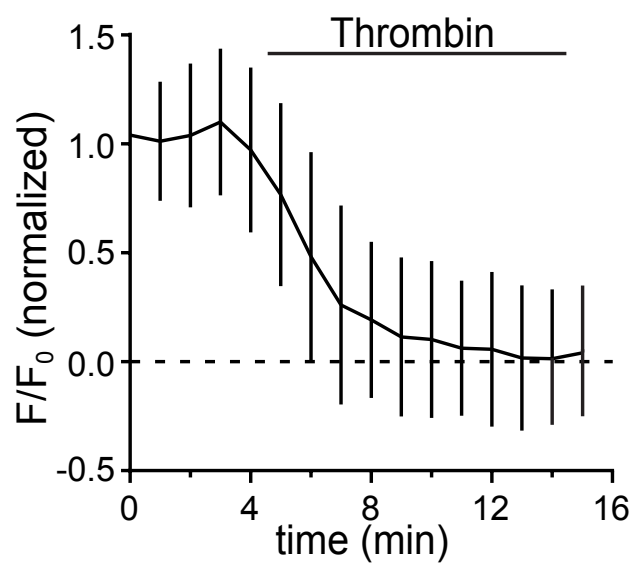

Supplement: supp [file elife-27362-supp-v1.zip]

Bowen et al. Figure 1 - figure supplement 1

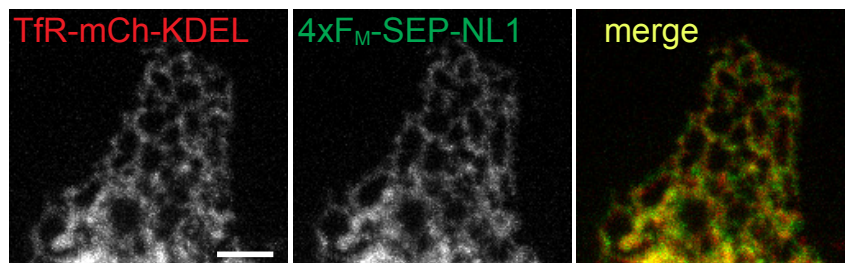

Supplement: supp [file elife-27362-supp-v1.zip]

Bowen et al. Figure 8 - figure supplement 1

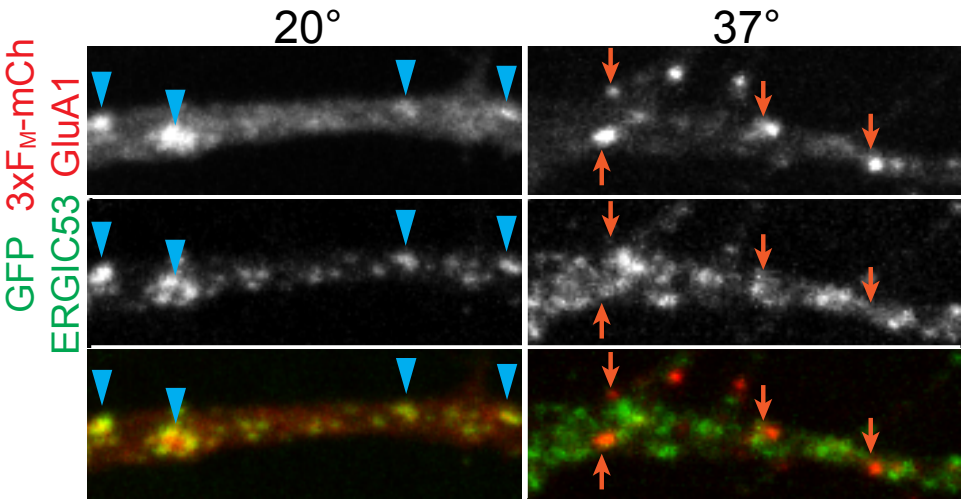

Supplement: supp [file elife-27362-supp-v1.zip]

Bowen et al. Figure 4 - figure supplement 2

A

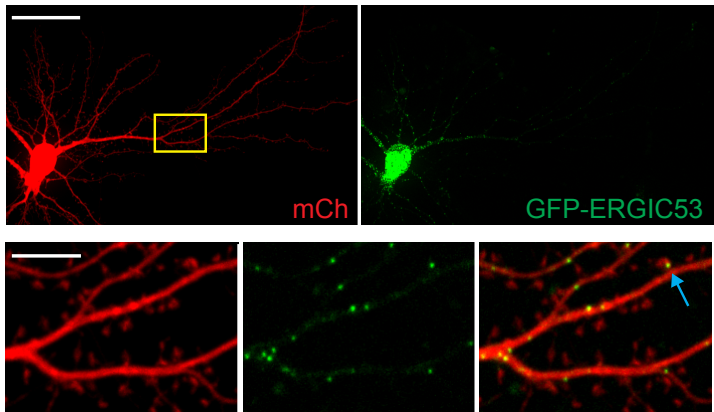

B

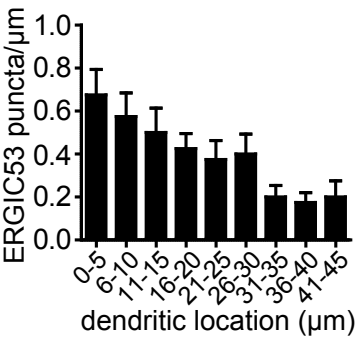

Supplement: supp [file elife-27362-supp-v1.zip]

Bowen et al. Figure 6 - Figure supplement 3

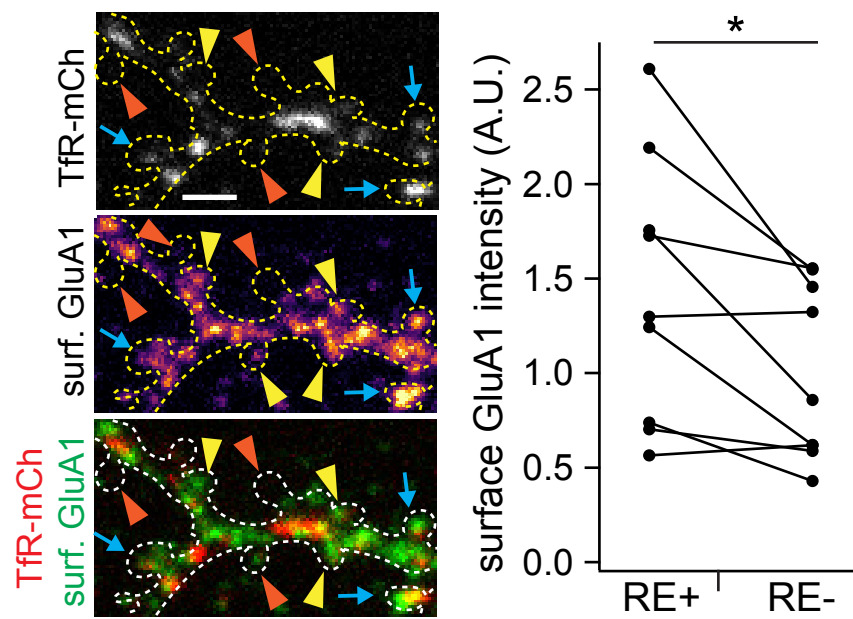

Supplement: supp [file elife-27362-supp-v1.zip]

Bowen et al. Figure 5 - figure supplement 2

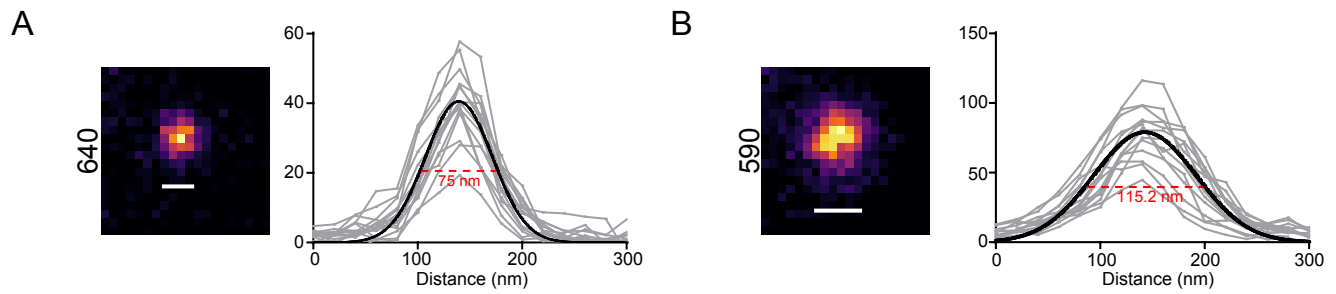

Supplement: supp [file elife-27362-supp-v1.zip]

Bowen et al. Figure 5 - figure supplement 1

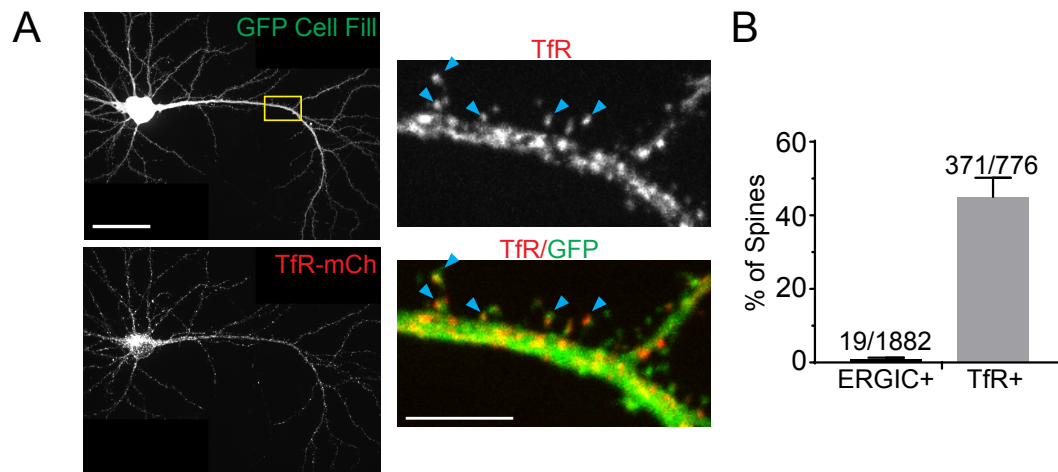

Supplement: supp [file elife-27362-supp-v1.zip]

Bowen et al., Figure 4 - figure supplement 4

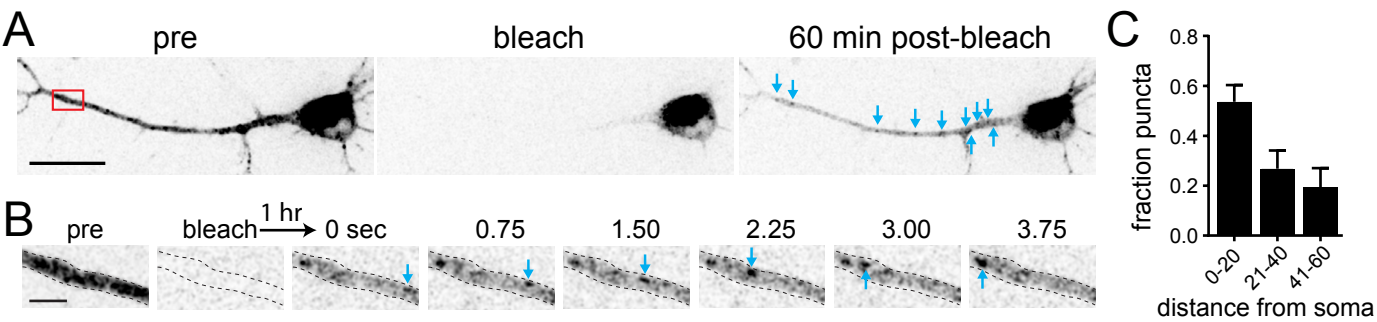

Supplement: supp [file elife-27362-supp-v1.zip]

Bowen et al., Figure 8 - figure supplement 4

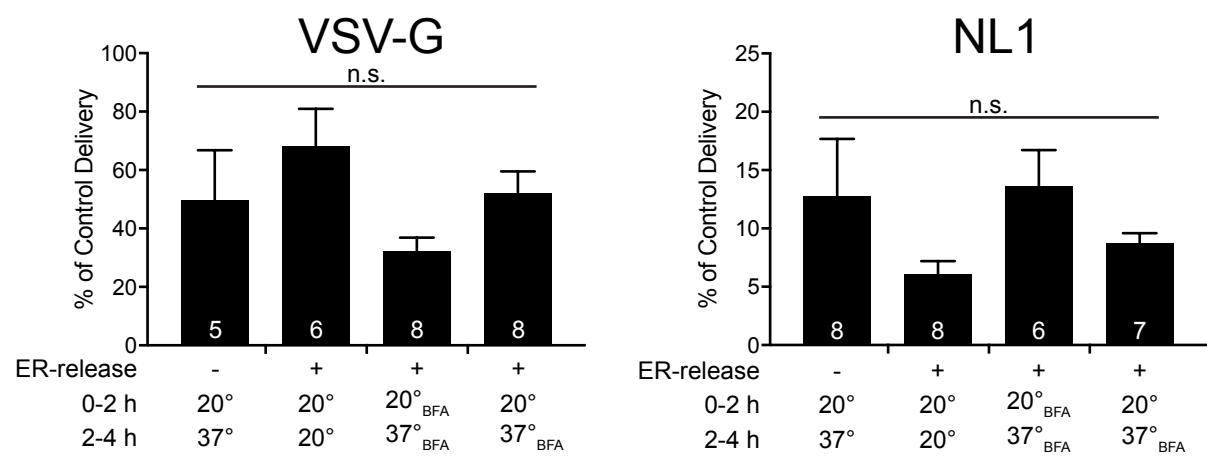

Supplement: supp [file elife-27362-supp-v1.zip]

Bowen et al. Figure 6 - figure supplement 4

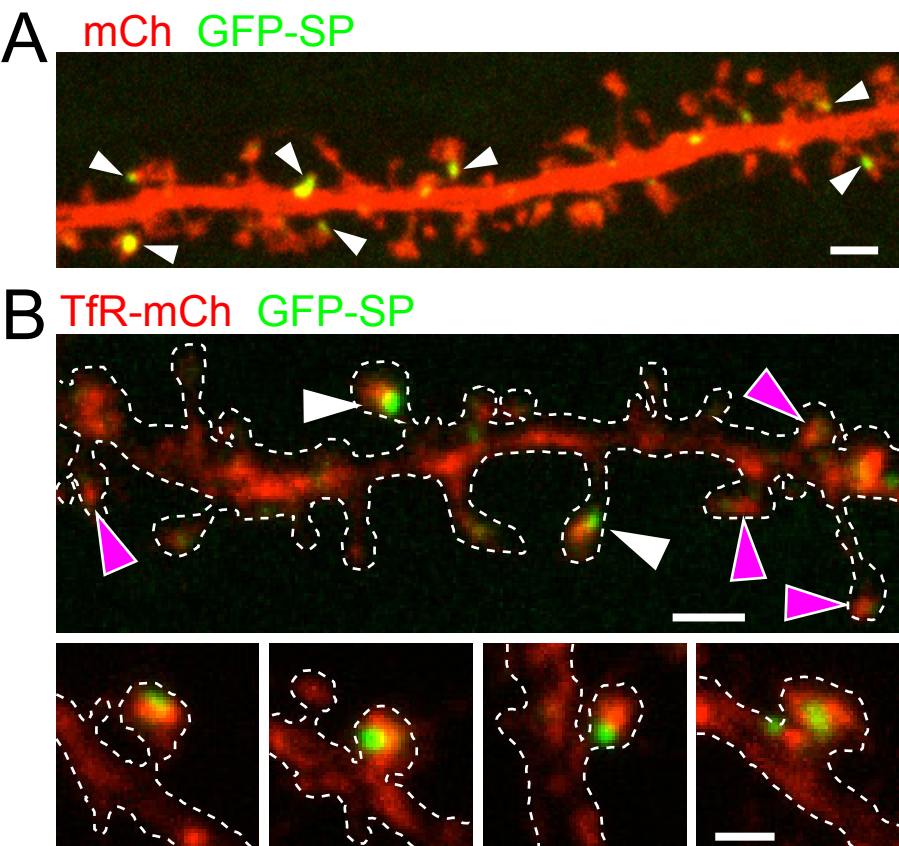

Supplement: supp [file elife-27362-supp-v1.zip]

Bowen et al. Figure 6 - figure supplement 2

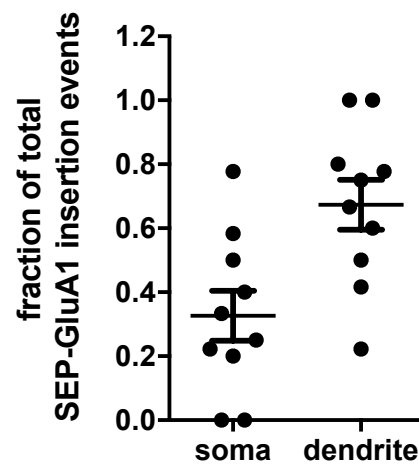

Supplement: supp [file elife-27362-supp-v1.zip › elife_poa_e27362_Figure_6_supplement_2.pdf]

Bowen et al. Figure 2 - figure supplement 1

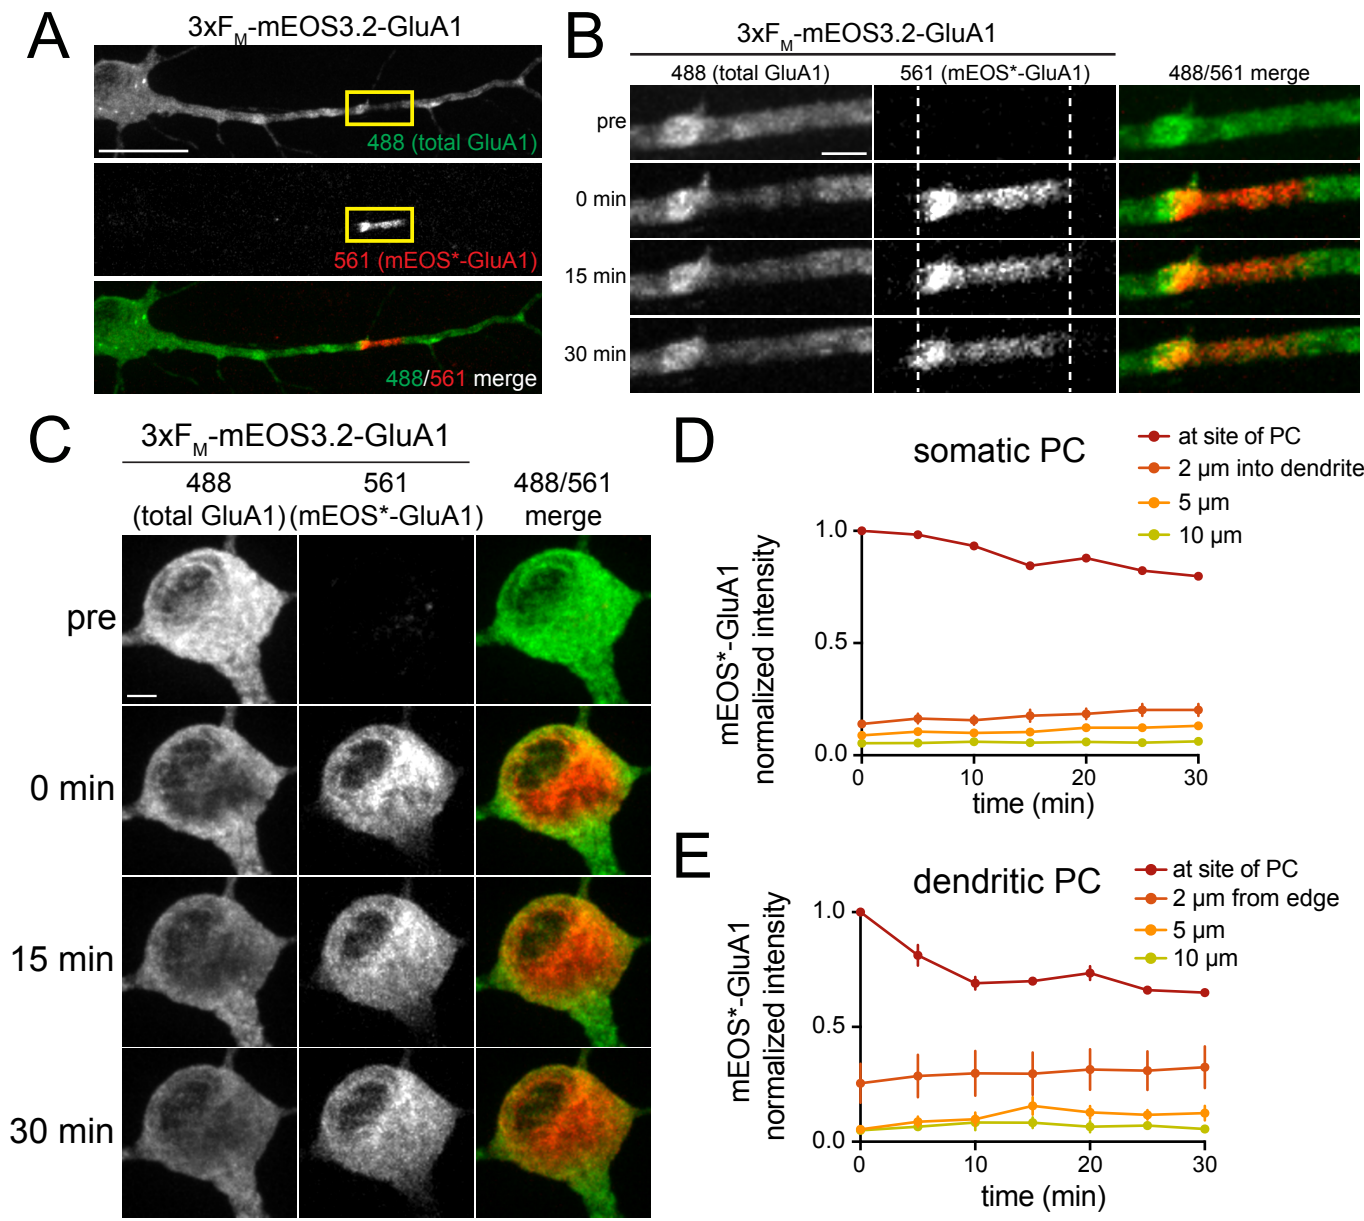

Supplement: supp [file elife-27362-supp-v1.zip › elife_poa_e27362_Figure_2_figure_supplement_1.pdf]
